# Supplementary material for: Early-life vancomycin treatment promotes airway inflammation and impairs microbiome homeostasis
Source: publisher site journal article supplement (doi:10.18632/aging.101901), 2019-04-13
Supplement: Supplementary file [file aging-v11i7-101901-supplementary-material-SD1.pdf]

SUPPLEMENTARY MATERIAL

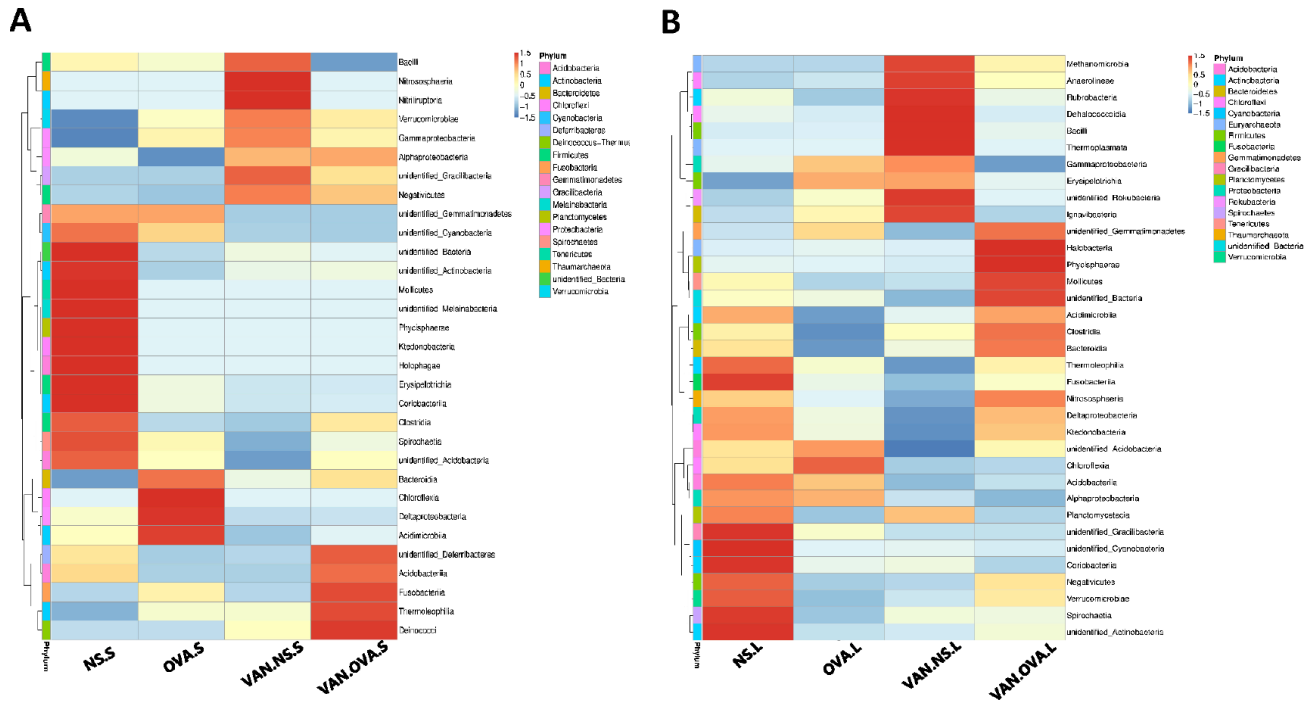

**Supplementary Figure 1. Heatmap showing relative abundance of the top 35 bacterial genera in the gut and lung microbiome, depicted by color intensity.** Relative abundance at the class level of the (A) gut and the (B) lung microbiota (n = 3) (NS.S: stool sample of the NS group; OVA.S: stool sample of the OVA group; VAN.NS.S: stool sample of the VAN-NS group; VAN.OVA.S: stool sample of the Van-OVA group; NS.L: lung tissue of the NS group; OVA.L: lung tissue of the OVA group; VAN.NS.L: lung tissue of the VAN-NS group; VAN.OVA.L: lung tissue of the Van-OVA group).
